# Supplementary material
Source: Royal Society of Chemistry journal article supplement (https://www.rsc.org/suppdata/books/178801/9781788012416/bk9781788012416-00131.pdf)
Supplement: Supplementary file 1 [file bk9781788012416-00131.pdf]

Members of the BPA Schools study consortium

| <b>Surname</b> | <b>Initials</b> | <b>Forename</b> | <b>Affiliation</b>               |
|----------------|-----------------|-----------------|----------------------------------|
| Mark           |                 | Hill            | Clyst Vale Community College     |
| Jasmine        | R               | Ayres           | Clyst Vale Community College     |
| Thomas         |                 | Blake           | Clyst Vale Community College     |
| Max            |                 | Branson         | Clyst Vale Community College     |
| Abigail        | S               | Bunkum          | Clyst Vale Community College     |
| Wai Chon       |                 | Cheong          | Clyst Vale Community College     |
| Lauren         | J               | Evans           | Clyst Vale Community College     |
| Amalia         | R               | Gimbuta         | Clyst Vale Community College     |
| Toby           | I               | Goodwin         | Clyst Vale Community College     |
| Robin          | P               | Hannaford       | Clyst Vale Community College     |
| Luke           | J               | Harris          | Clyst Vale Community College     |
| Ferne          | R               | Kelly           | Clyst Vale Community College     |
| Shannon        | T               | Reiness         | Clyst Vale Community College     |
| Eleanor        | J               | Self            | Clyst Vale Community College     |
| Katherine      | O               | Stagg           | Clyst Vale Community College     |
| Peter          | JC              | Boddington      | Exeter School                    |
| Andrew         | B               | Brew            | Exeter School                    |
| George         | W               | Hoult           | Exeter School                    |
| Suraj          | M               | Gandhi          | Exeter School                    |
| Joshua         | G               | Hanna           | Exeter School                    |
| Harry          | FZ              | Hart            | Exeter School                    |
| Thomas         | RW              | Hart            | Exeter School                    |
| Harriet        | M               | Jenner          | Exeter School                    |
| Annabel        | D               | Ling            | Exeter School                    |
| Elspeth        | O               | Mabin           | Exeter School                    |
| Abigail        | M               | Pelling         | Exeter School                    |
| Rebecca        | C               | Richardson      | Exeter School                    |
| Hannah         | V               | Withers         | Exeter School                    |
| Nicholas       | W               | Long            | South Dartmoor Community College |
| Megan          | R               | Abbott          | South Dartmoor Community College |
| Alice          | C               | Crocker         | South Dartmoor Community College |
| Merlin         |                 | Davies          | South Dartmoor Community College |
| Rebecca        | L               | Evans           | South Dartmoor Community College |
| Oliver         | I               | Mant            | South Dartmoor Community College |
| Alexandra      | C               | McHugh          | South Dartmoor Community College |
| Alex           | J               | Murray-Preece   | South Dartmoor Community College |
| Louise         | Y               | Pearse          | South Dartmoor Community College |
| Thomas         | J               | Roberts         | South Dartmoor Community College |
| Molly          |                 | Sansom          | South Dartmoor Community College |
| Eve            | M I P           | Scott           | South Dartmoor Community College |
| Samuel         | J               | Tomkinson       | South Dartmoor Community College |
| Ross           |                 | Spicer          | South Dartmoor Community College |
| Mel            | C               | Parker          | Honiton Community College        |
| Ameerah        | M               | Askew           | Honiton Community College        |
| Kyle           | T               | Blackmore       | Honiton Community College        |

|           |     |                |                           |
|-----------|-----|----------------|---------------------------|
| Caitlin   | L   | Burnett        | Honiton Community College |
| Isla      | L   | Cloke          | Honiton Community College |
| Kira      | J   | Foster         | Honiton Community College |
| Ella      | L   | George         | Honiton Community College |
| Daniel    | J   | Hole           | Honiton Community College |
| Lauren    | J   | Hunt           | Honiton Community College |
| Jack      |     | Lane           | Honiton Community College |
| Callum    | J   | Nicholas       | Honiton Community College |
| Ben       | C   | Willis         | Honiton Community College |
| Lena      |     | Marvolo        | Exeter College            |
| Richard   | G   | Lloyd          | Exeter College            |
| Riona     |     | Adams          | Exeter College            |
| Zoe       |     | Baker          | Exeter College            |
| Kai       | S   | Cartwright     | Exeter College            |
| Lucinda   |     | Cauchois       | Exeter College            |
| Alana     | L   | Cram           | Exeter College            |
| Brianna   | M   | Dooley         | Exeter College            |
| Ella      |     | Fermor-Kissane | Exeter College            |
| Annick    |     | Gielens        | Exeter College            |
| Jessica   | M   | Godfrey        | Exeter College            |
| Shauna    |     | Green          | Exeter College            |
| Hesham    | MH  | Hanna          | Exeter College            |
| Lewis     | E   | Hare           | Exeter College            |
| Hannah    | M   | Hart           | Exeter College            |
| Freya     | J   | Hester         | Exeter College            |
| Nicola    | LM  | Hill           | Exeter College            |
| Honour    |     | James          | Exeter College            |
| Jalil     |     | Khalil         | Exeter College            |
| Callum    |     | Larcombe       | Exeter College            |
| Zhengchao |     | Lu             | Exeter College            |
| Zoe       |     | McCarthy       | Exeter College            |
| Qiaochu   |     | Meng           | Exeter College            |
| Rhiannon  | I   | Morris         | Exeter College            |
| Son       |     | Nguyen         | Exeter College            |
| Isobella  |     | Perks          | Exeter College            |
| Bethan    |     | Soanes         | Exeter College            |
| Elizabeth | L   | Ward           | Exeter College            |
| Jade      |     | Webb           | Exeter College            |
| Jemima    |     | Western        | Exeter College            |
| Charley   |     | Winter         | Exeter College            |
| Kerry     | J   | Burnham        | Exeter Mathematics School |
| Denis     |     | Akkavim        | Exeter Mathematics School |
| Will      | A   | Bevington      | Exeter Mathematics School |
| Luke      | PJL | Bowden         | Exeter Mathematics School |
| James     | J   | Cockayne       | Exeter Mathematics School |
| Louis     | GT  | de Mendonça    | Exeter Mathematics School |
| Harry     | B   | Donovan        | Exeter Mathematics School |
| Alex      | T   | Drake          | Exeter Mathematics School |

|         |     |            |                           |
|---------|-----|------------|---------------------------|
| Jack    | T   | Fulls      | Exeter Mathematics School |
| Theo    | HD  | Greenslade | Exeter Mathematics School |
| Embla   | F   | Hocking    | Exeter Mathematics School |
| David   | A   | Hooton     | Exeter Mathematics School |
| Nat     |     | Lea        | Exeter Mathematics School |
| Bethany |     | Lee        | Exeter Mathematics School |
| Patrick | J   | Locke      | Exeter Mathematics School |
| Sam     | R   | Marriott   | Exeter Mathematics School |
| Alex    | J   | Pace       | Exeter Mathematics School |
| Chris   | G   | Parsons    | Exeter Mathematics School |
| Mike    |     | Price      | Exeter Mathematics School |
| Jon     | M   | Reeves     | Exeter Mathematics School |
| Jake    | J   | Shiel      | Exeter Mathematics School |
| Ethan   | J   | Teague     | Exeter Mathematics School |
| Mike    | D   | Thornton   | Exeter Mathematics School |
| Ruth    | J   | Trevelyan  | Exeter Mathematics School |
| Donovan | P   | Tripp      | Exeter Mathematics School |
| Eleanor | M   | Van Vogt   | Exeter Mathematics School |
| Hugh    | R   | Willman    | Exeter Mathematics School |
| Alex    | RJF | Winter     | Exeter Mathematics School |
| Natalie | A   | Woods      | Exeter Mathematics School |
| Jasmine | M   | Wootten    | Exeter Mathematics School |
